# Supplementary figures and images for: Inhibition of 11β‐Hydroxysteroid dehydrogenase‐1 with AZD4017 in patients with nonalcoholic steatohepatitis or nonalcoholic fatty liver disease: A randomized, double‐blind, placebo‐controlled, phase II study
Source: PubMed Central journal article supplement — Diabetes Obes Metab. 2022 Jan 25;24(5):881–90. doi: 10.1111/dom.14646 (PMC9135169; doi:10.1111/dom.14646), 2022-01-25

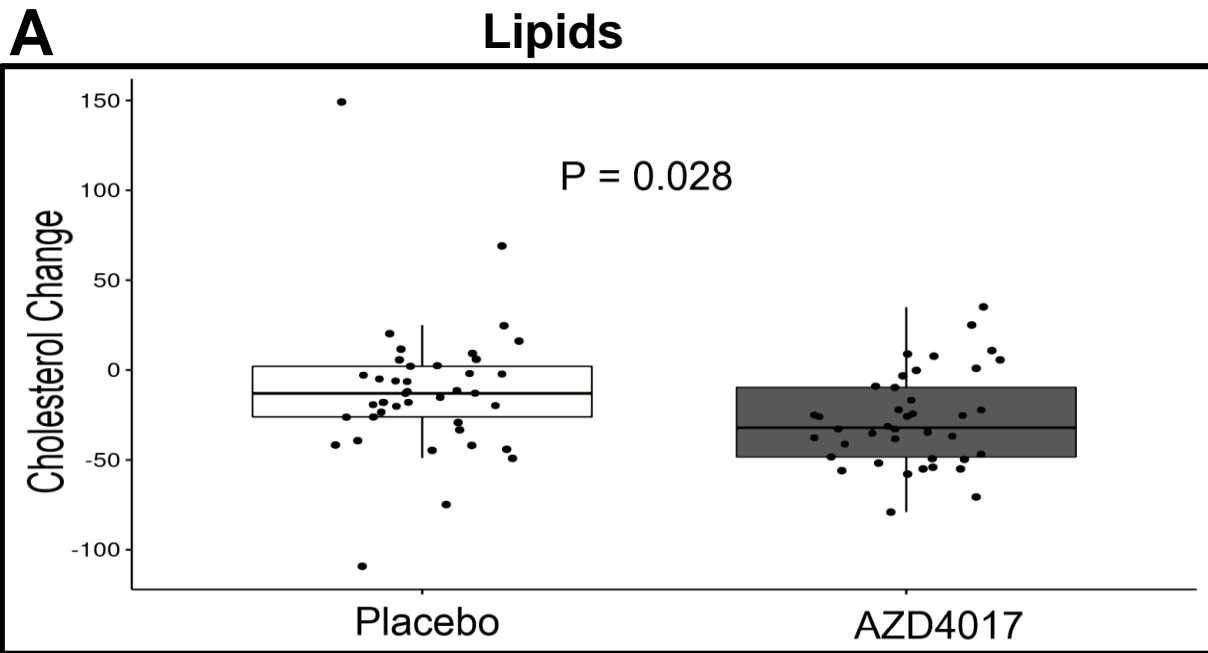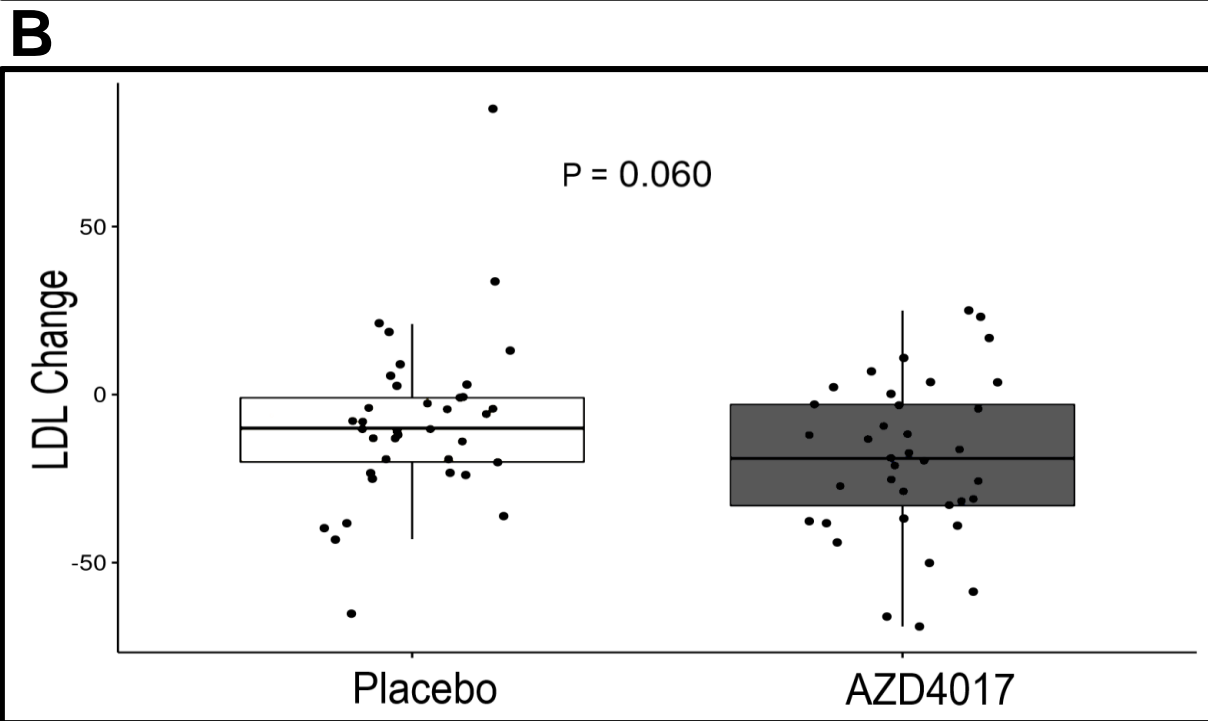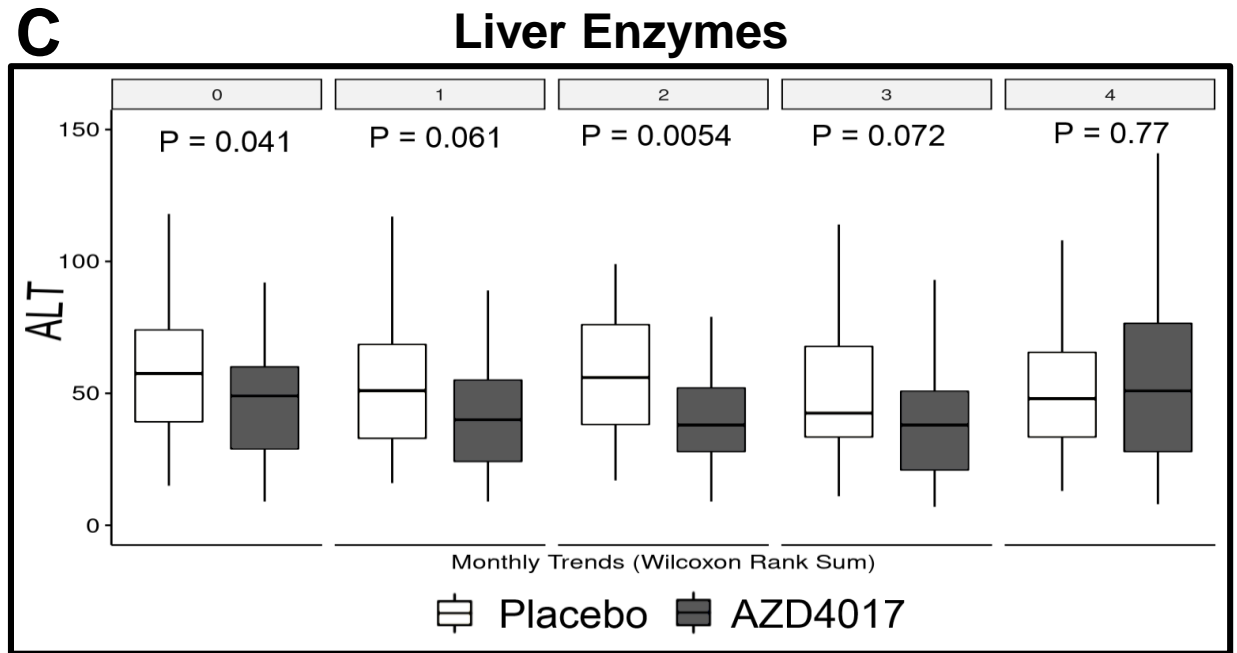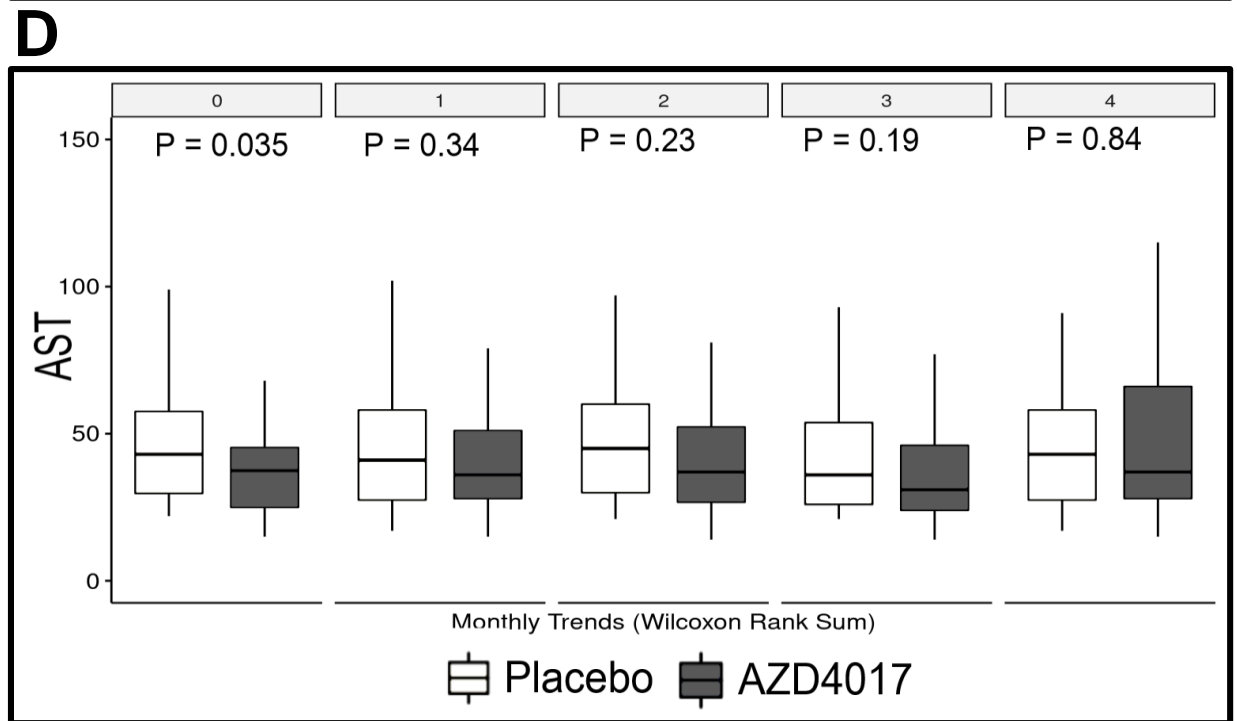

Supplement: NIHMS1802024-supplement-S_Figure_1.pdf [file NIHMS1802024-supplement-S_Figure_1.pdf]

# Hepatic Cortisol Production

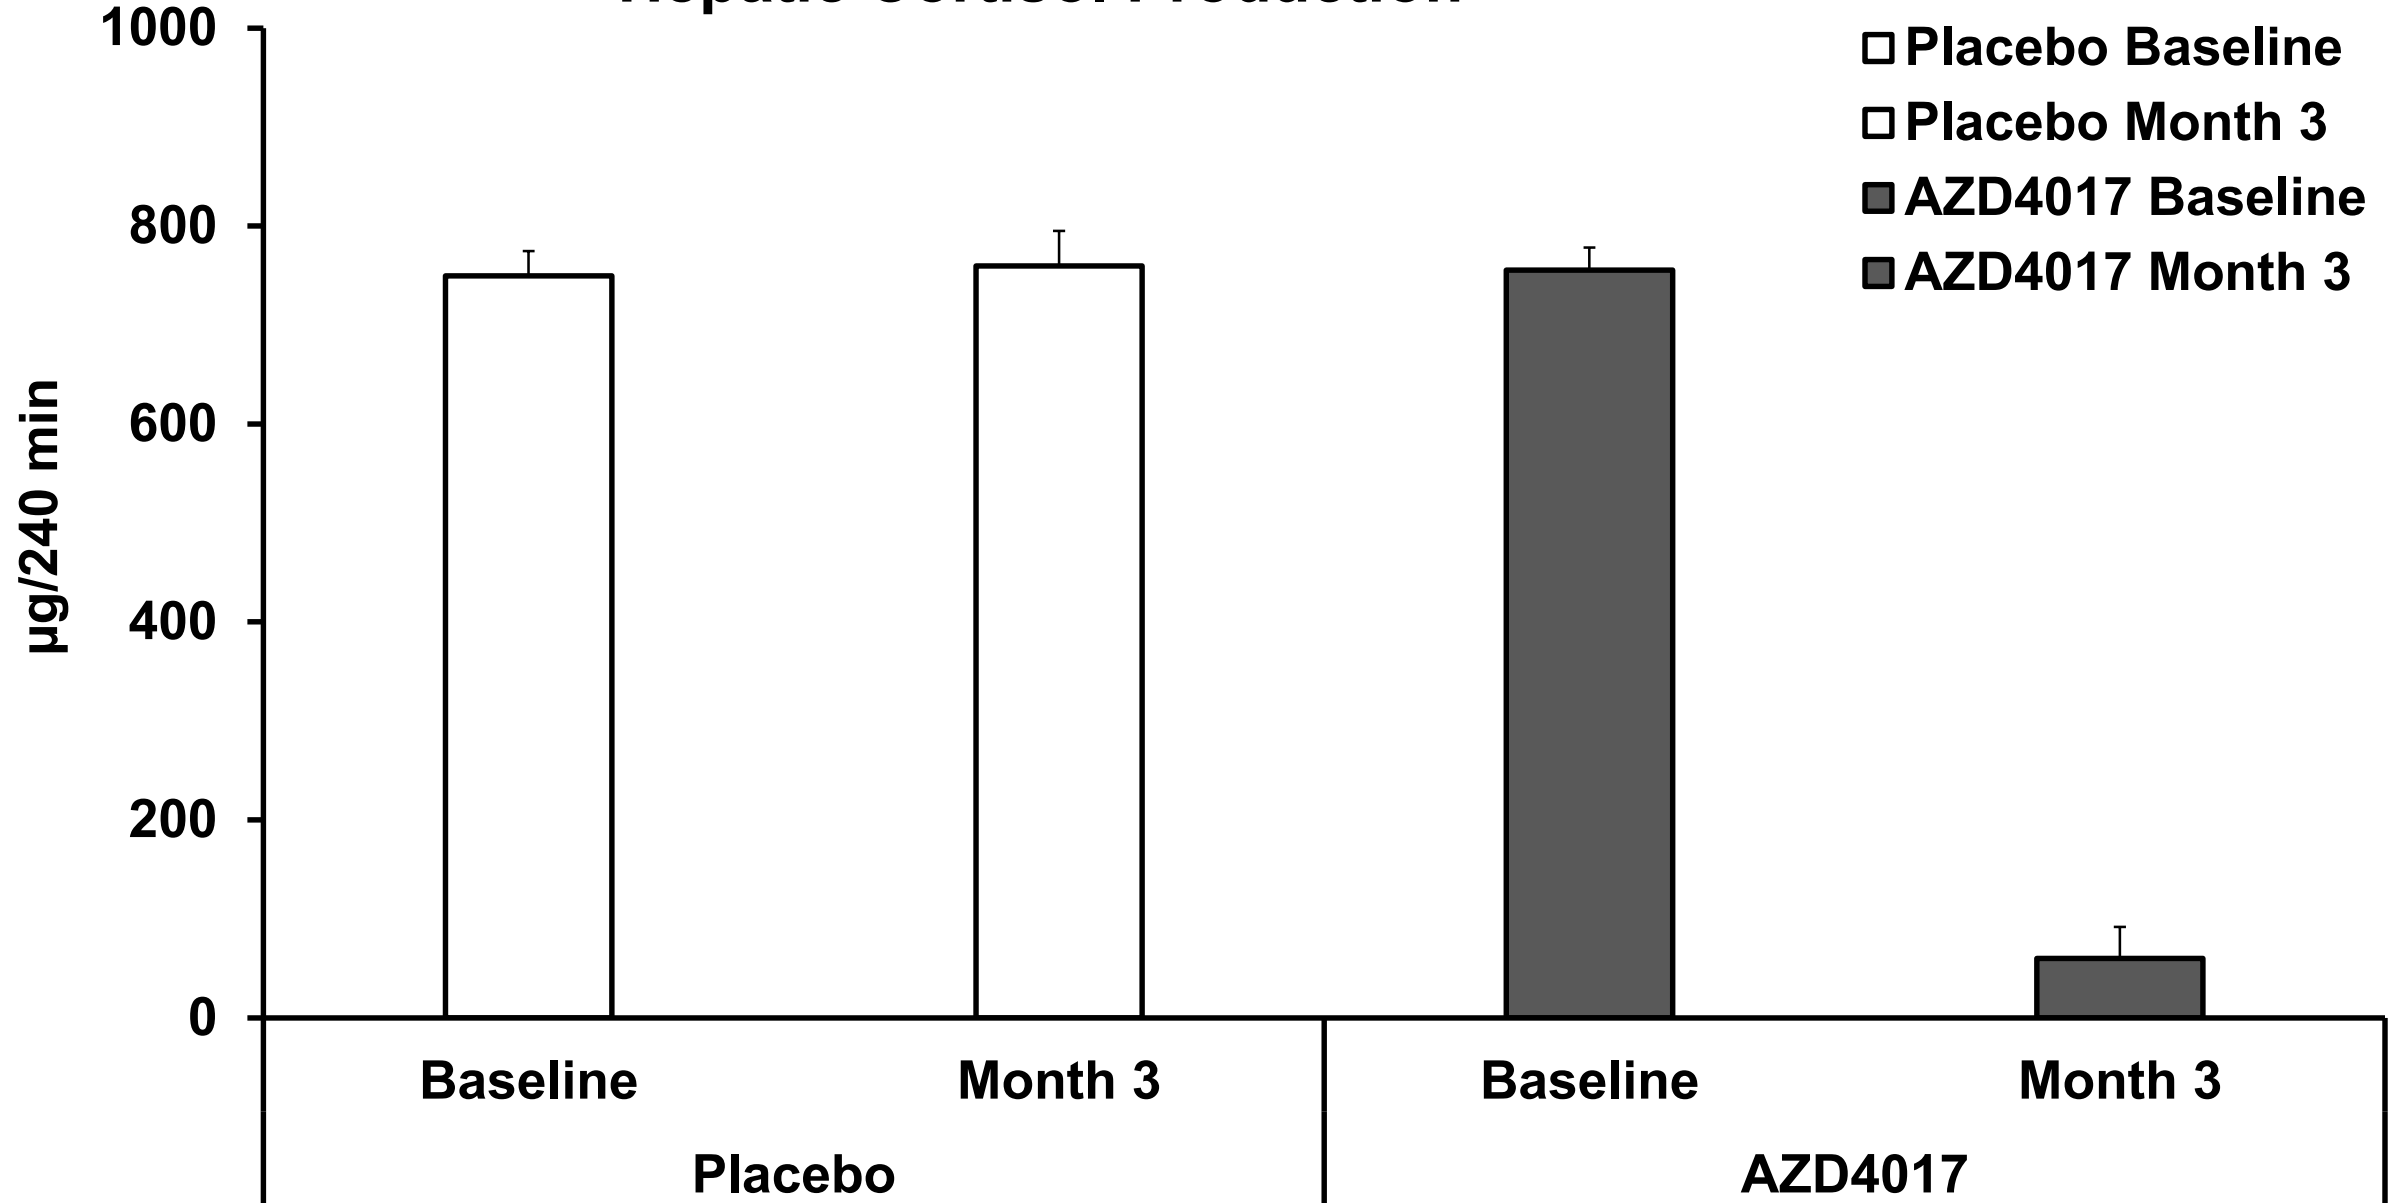

Supplement: NIHMS1802024-supplement-S_Figure_2.pdf [file NIHMS1802024-supplement-S_Figure_2.pdf]
